# Supplementary material for: Investigating the properties of fatty acid-based ionic liquids: advancement in AMOEBA force field
Source: Royal Society of Chemistry journal article supplement (doi:10.1039/d4cp01809e), 2024-01-01
Supplement: d4cp01809e4.pdf [file d4cp01809e4.pdf]

# Investigating the Properties of Fatty Acid-based Ionic Liquids: Advancement in AMOEBA Force Field

## Supplimentary Information

Sahar Heidari and Hedieh Torabifard\*

*Department of Chemistry and Biochemistry, University of Texas at Dallas, Richardson,  
TX, 75080, USA*

E-mail: Hedieh.Torabifard@utdallas.edu

### Fragments Used for Parameterization

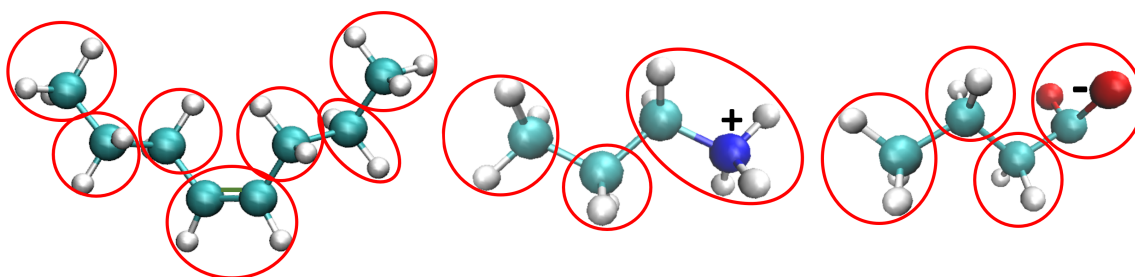

Figure S1: Fragments that are parameterized for  $[\text{C}_4\text{NH}_3]^+[\text{OLE}]^-$  ion pair. Distinct polarization groups in parameterization of anion and cation in  $[\text{C}_4\text{NH}_3]^+[\text{OLE}]^-$  are  $-\text{COO}^-$ ,  $-\text{CH}_2-$ ,  $-\text{CH}_3-$ ,  $-\text{HC}=\text{CH}-$  and  $-\text{CH}_2-\text{NH}_3^+$  which are defined in red circles.

# Compare the Decomposed Energy Calculated by QM and MM for $[\text{EMIM}]^+[\text{PALM}]^-$

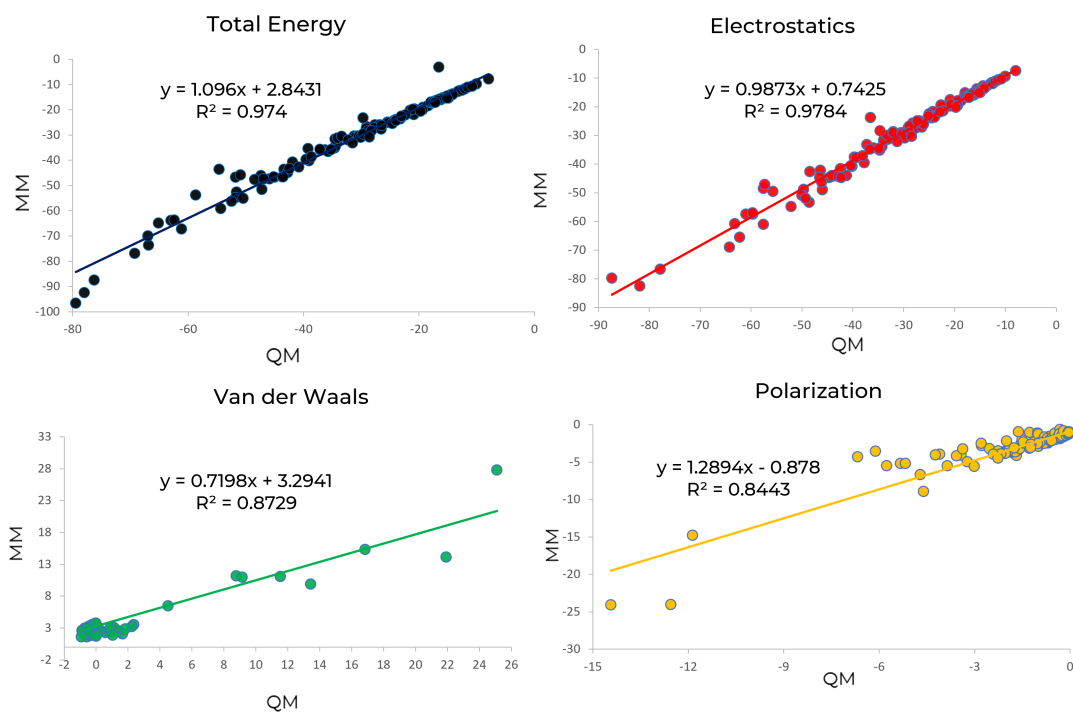

Figure S2: Comparison of intermolecular interaction energies for the  $[\text{EMIM}]^+[\text{PALM}]^-$  ionic pair with randomly varied distances between the anion and cation, using SAPT (QM) and the ANALYZE program in TINKER with the newly developed parameters (MM).

# Diffusion Log-Log MSD vs Time Plots

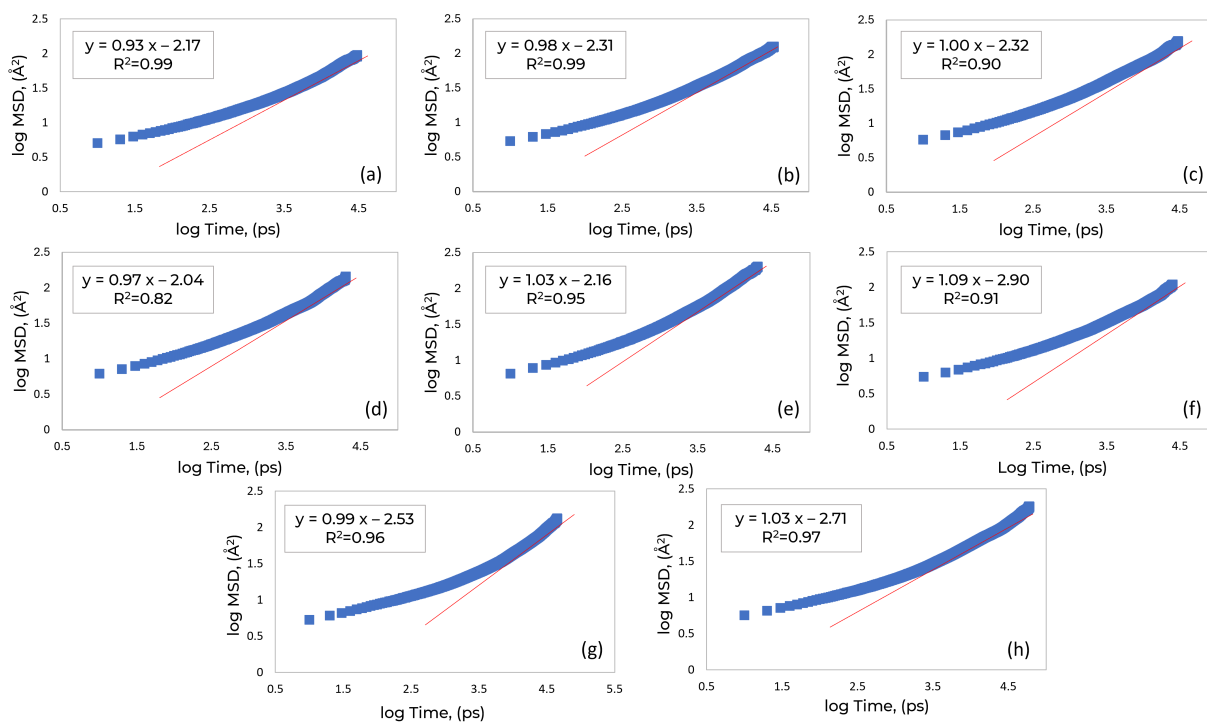

Figure S3: Log MSD vs log time for IL's at different temperatures were plotted. Plots (a), (b), (c), (d), and (e) correspond to  $[\text{C}_4\text{NH}_3]^+[\text{OLE}]^-$  at 288.15, 293.15, 298.15, 303.15 and 308.15 K respectively. Plots (f), (g), and (h) correspond to  $[\text{NH}_4]^+[\text{PALM}]^-$  at 298 K and  $[\text{EMIM}]^+[\text{PALM}]^-$  at 315, and 320 K, respectively.

# Density and Diffusion Coefficient Calculation Range

Table S1: Total simulation times and trajectory ranges used for determining the averaged density and diffusion coefficients.

| Ionic liquid         | Temperature<br>( $K$ ) | Total Simulation Time<br>( $ns$ ) | Trajectory Range ( $ns$ ) |                                  |
|----------------------|------------------------|-----------------------------------|---------------------------|----------------------------------|
|                      |                        |                                   | Density ( $\rho$ )        | Diffusion Coefficient ( $D\pm$ ) |
| $[C_4NH_3]^+[OLE]^-$ | 288.15                 | 30                                | 25-30                     | 27-29                            |
|                      | 293.15                 | 34                                | 30-34                     | 30-32                            |
|                      | 298.15                 | 30                                | 20-30                     | 26-30                            |
|                      | 303.15                 | 20                                | 10-20                     | 18-20                            |
|                      | 308.15                 | 20                                | 10-20                     | 17.8-20                          |
| $[NH_4]^+[PALM]^-$   | 298                    | 25                                | 20-25                     | 19-25                            |
| $[EMIM]^+[PALM]^-$   | 315                    | 45                                | 35-45                     | 39-44                            |
|                      | 320                    | 60                                | 50-60                     | 55-58.5                          |

## The Structure Factor Plots

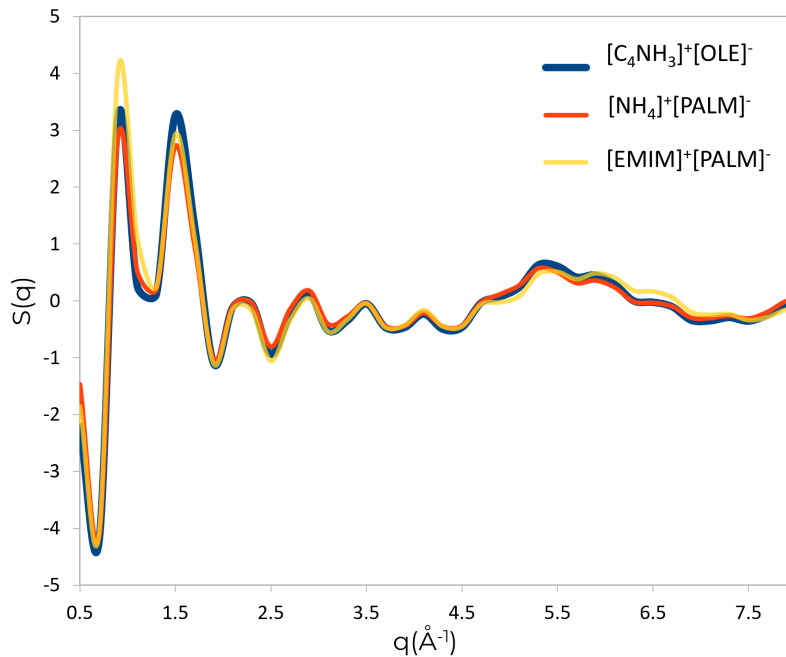

Figure S4: Calculated total structure factor ( $S(q)$ ) for  $[C_4NH_3]^+[OLE]^-$  at 298.15 K,  $[NH_4]^+[PALM]^-$  at 298 K and  $[EMIM]^+[PALM]^-$  at 315 K.
