# Supplementary figures and images for: Investigating the properties of fatty acid-based ionic liquids: advancement in AMOEBA force field
Source: Royal Society of Chemistry journal article supplement (doi:10.1039/d4cp01809e), 2024-01-01

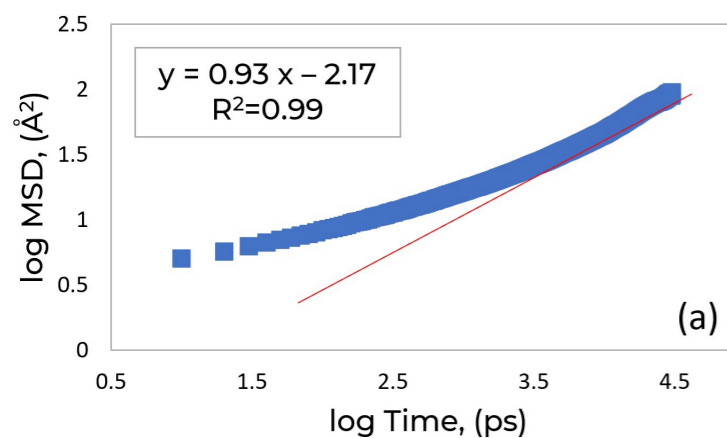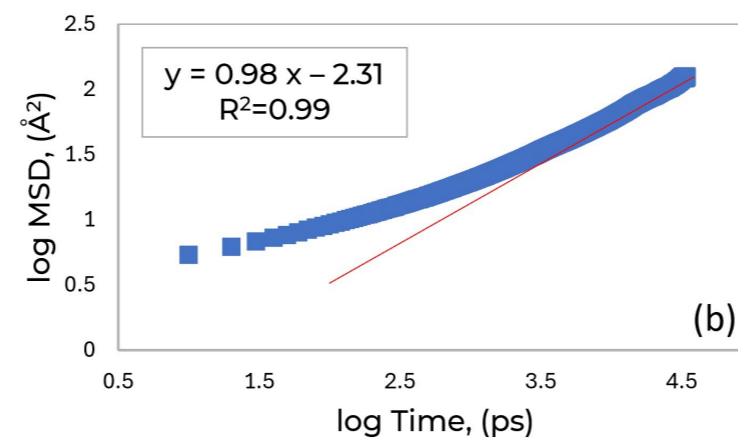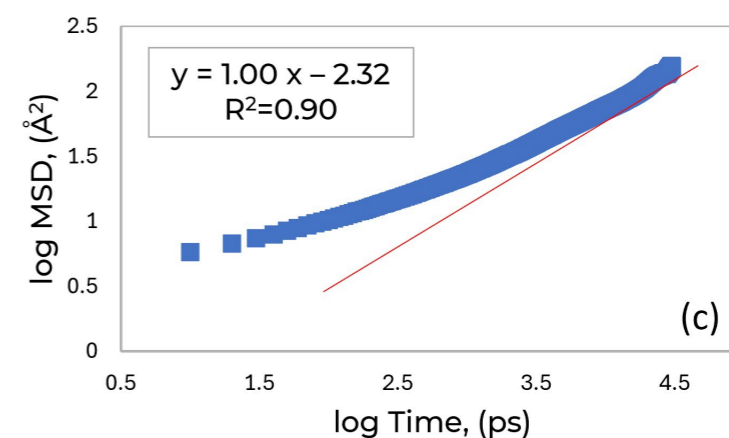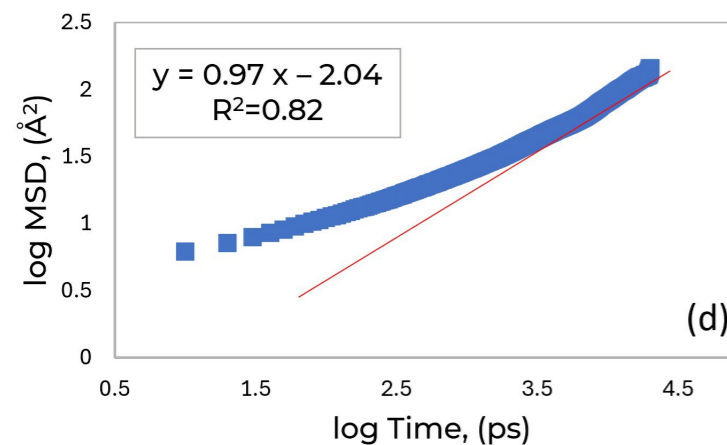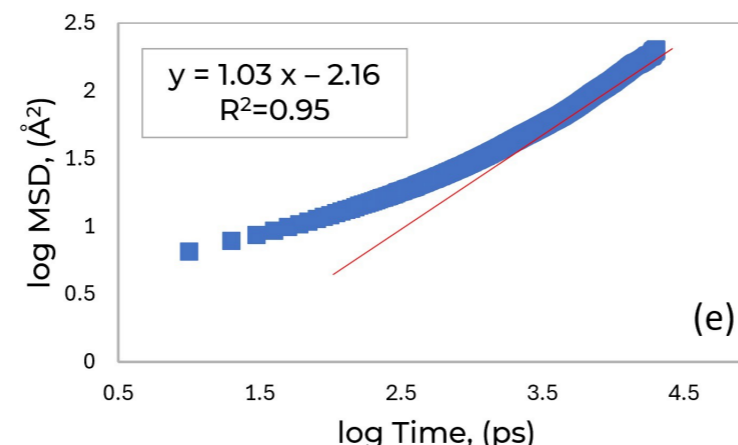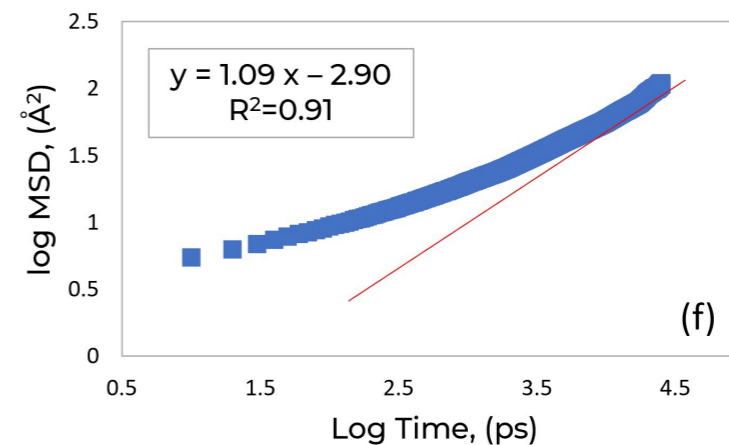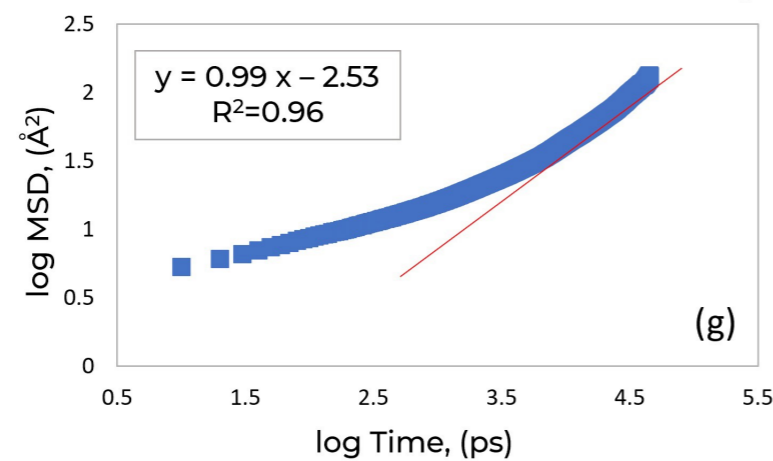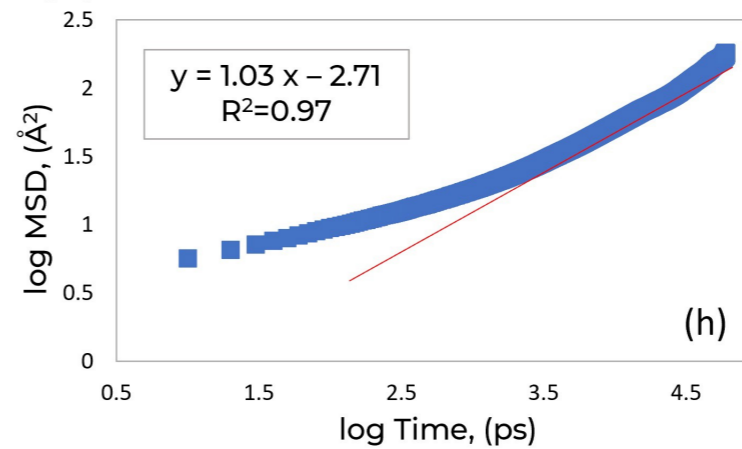

Supplement: d4cp01809e1.pdf [file d4cp01809e1.pdf]

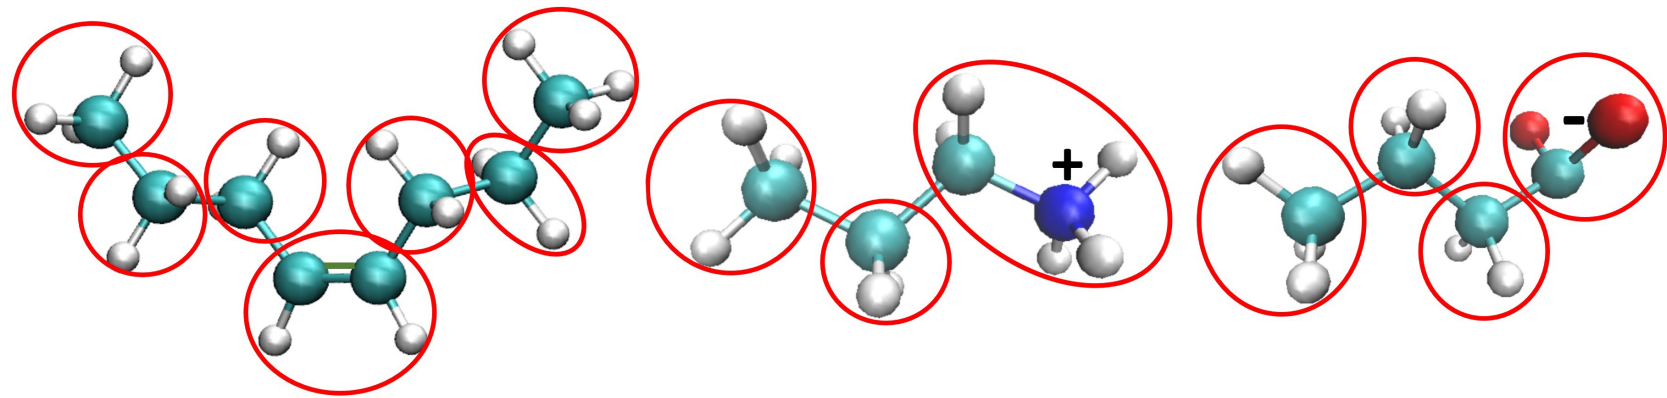

Supplement: d4cp01809e2.pdf [file d4cp01809e2.pdf]

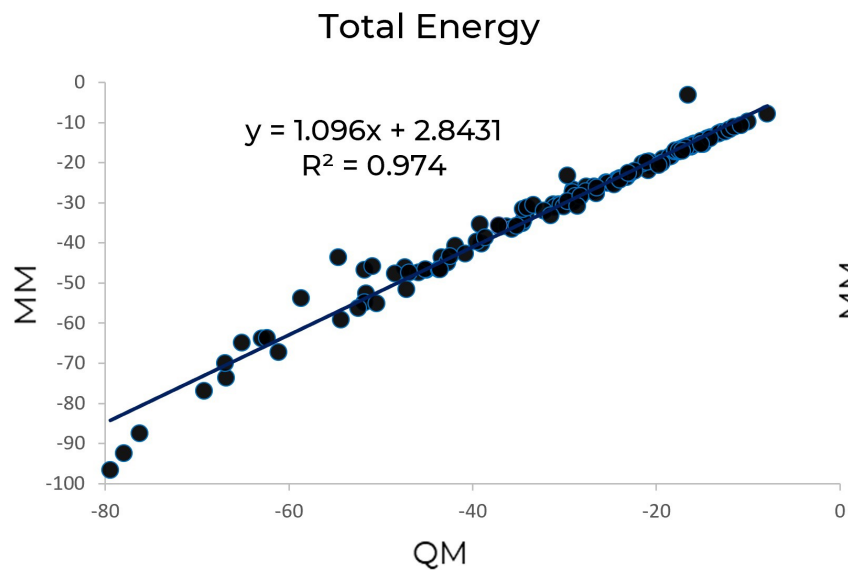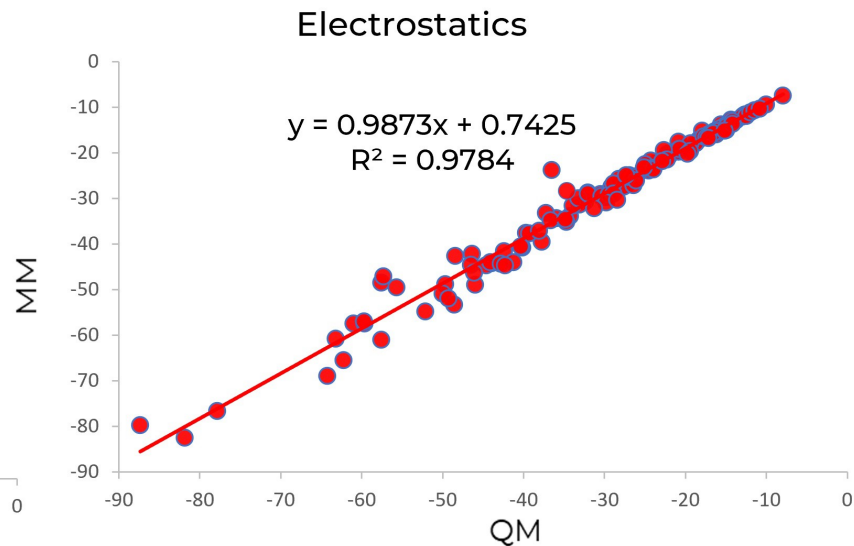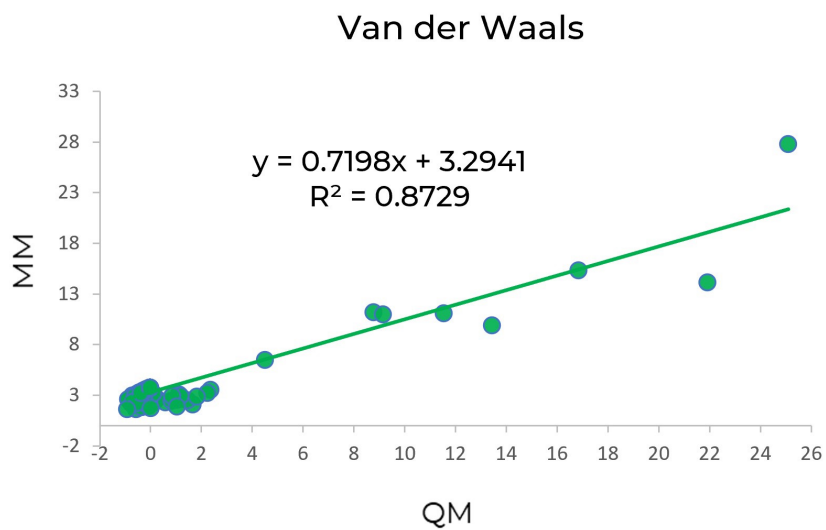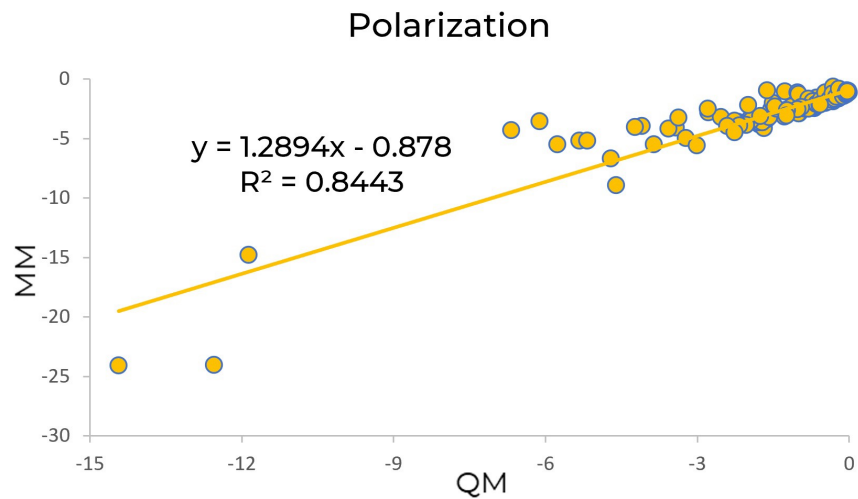

Supplement: d4cp01809e3.pdf [file d4cp01809e3.pdf]

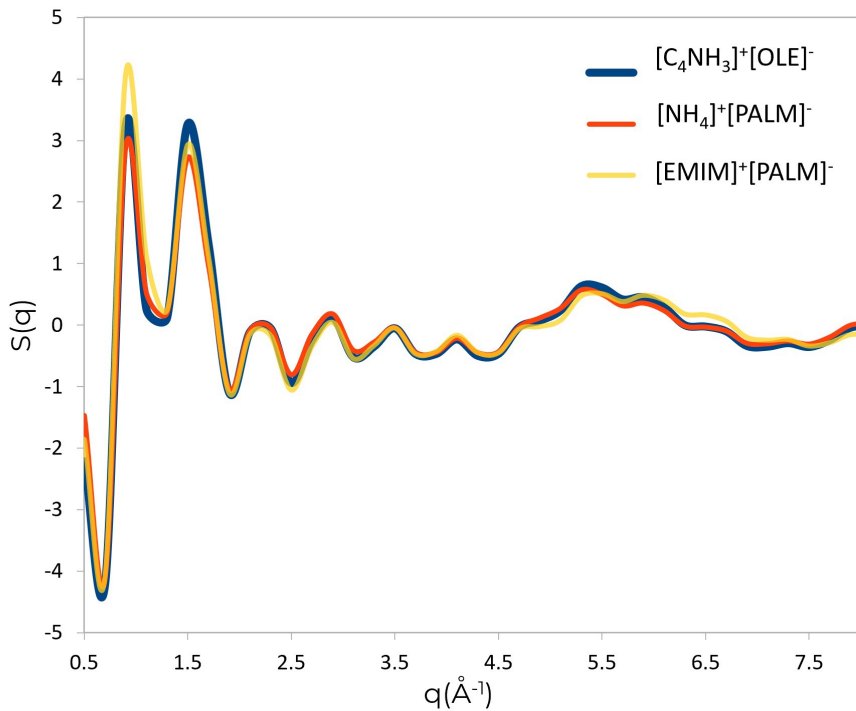

Supplement: d4cp01809e5.pdf [file d4cp01809e5.pdf]
